# Supplementary material
Source: ML conference proceedings conference paper supplement (https://openreview.net/forum?id=63ANb4r7EM)

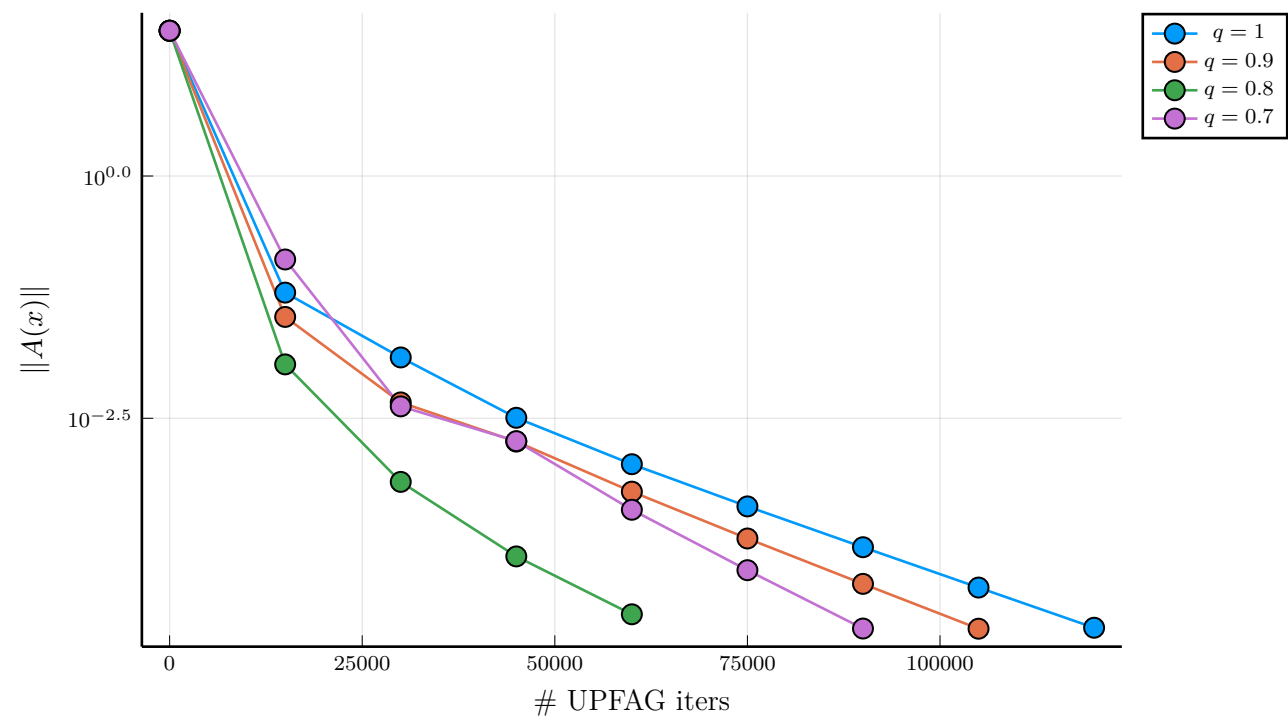

Supplement: supplementary_material [file clustering_fmnist_feasibility.pdf › nonconvex_power_alm_supp/experiments/clustering/results/clustering_fmnist_feasibility.pdf]

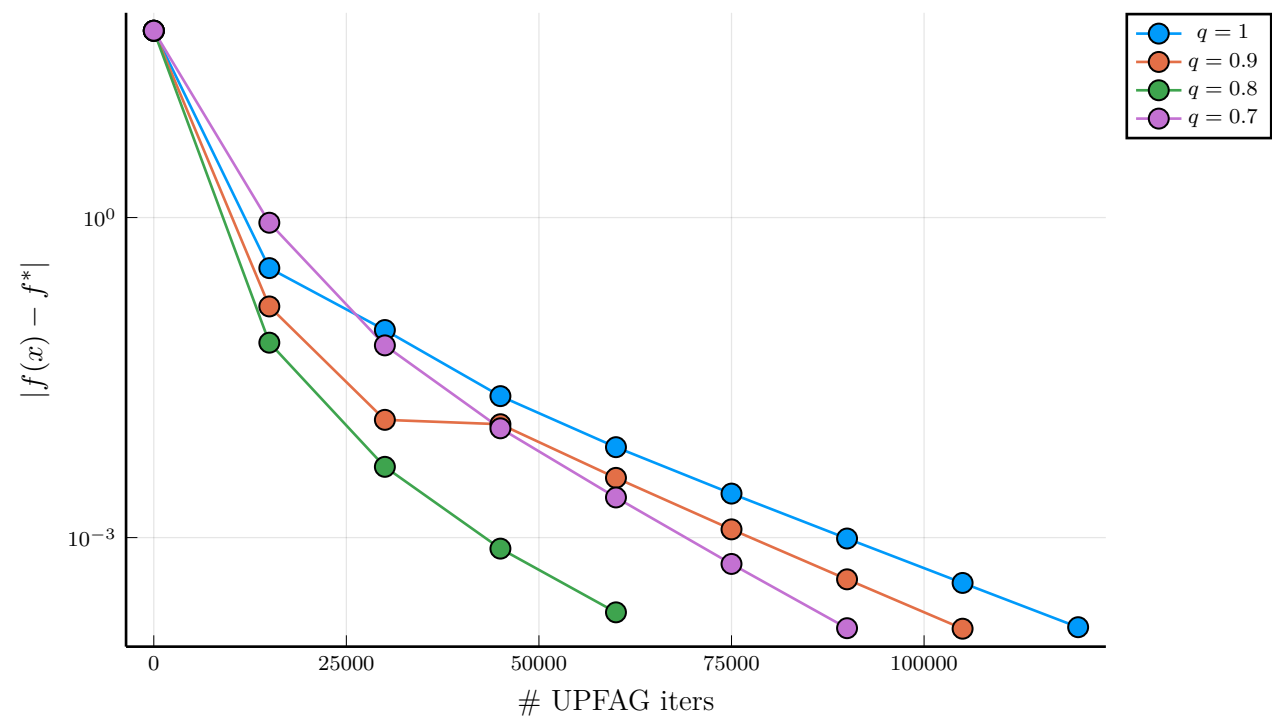

Supplement: supplementary_material [file clustering_fmnist_objective.pdf › nonconvex_power_alm_supp/experiments/clustering/results/clustering_fmnist_objective.pdf]

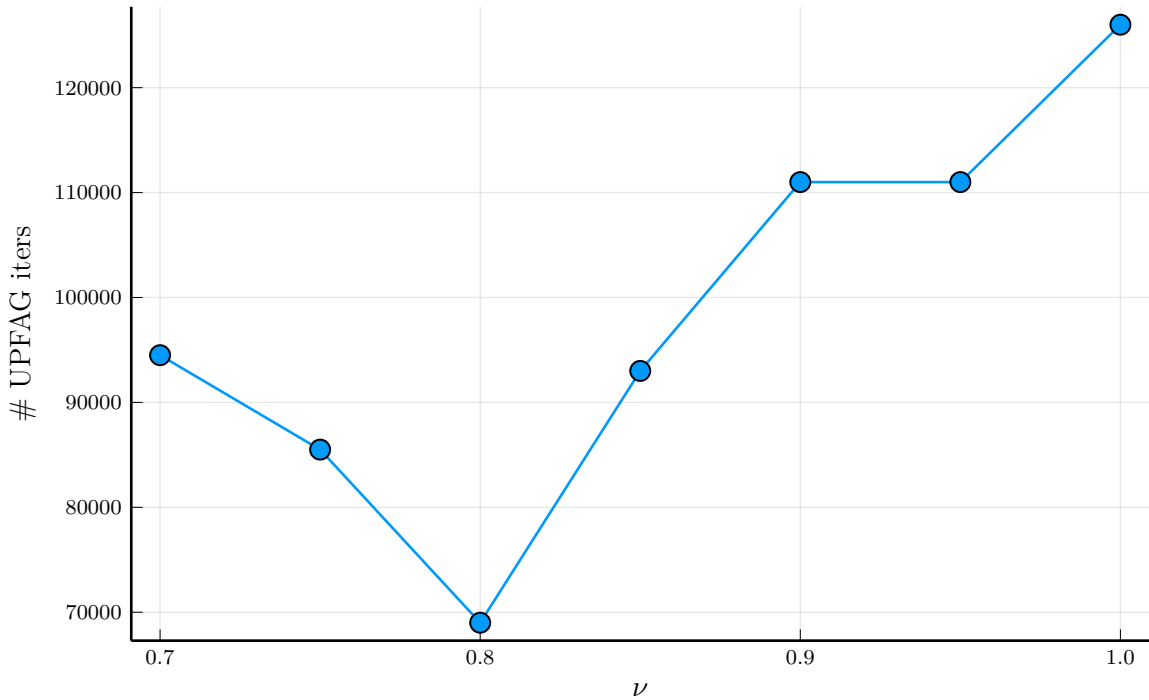

Supplement: supplementary_material [file clustering_fmnist_powers.pdf › nonconvex_power_alm_supp/experiments/clustering/results/clustering_fmnist_powers.pdf]

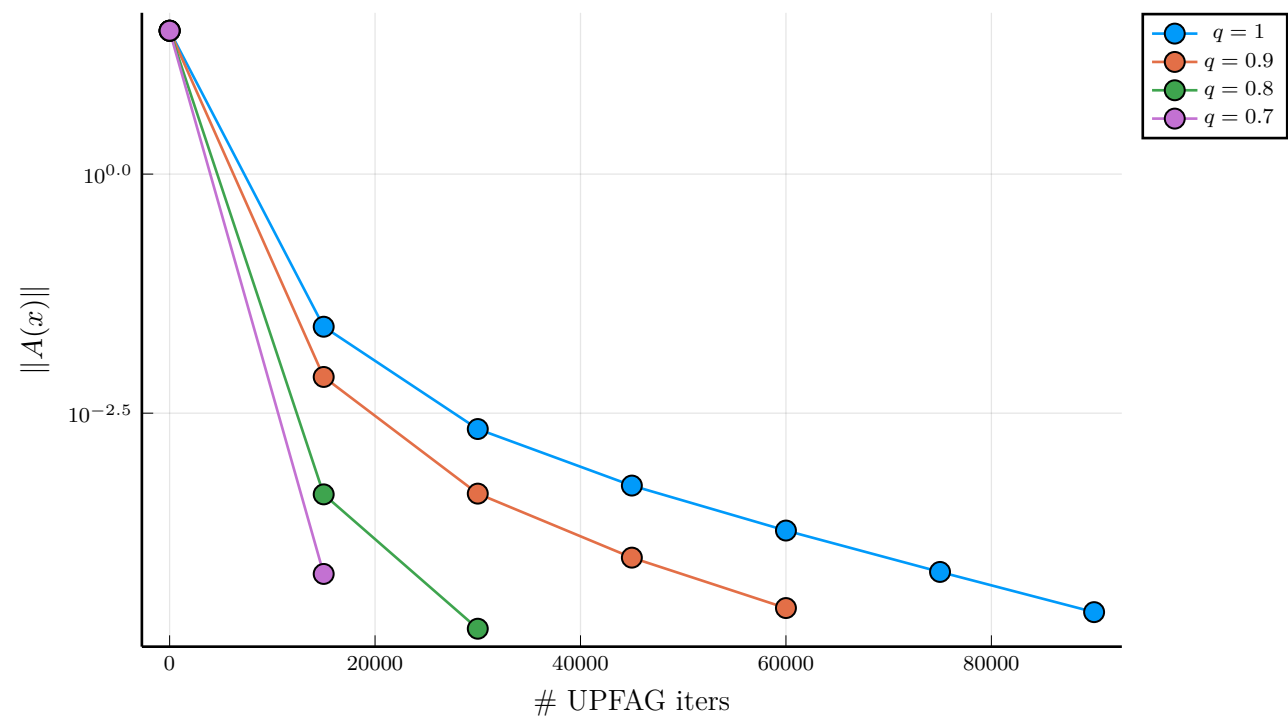

Supplement: supplementary_material [file clustering_mnist_feasibility.pdf › nonconvex_power_alm_supp/experiments/clustering/results/clustering_mnist_feasibility.pdf]

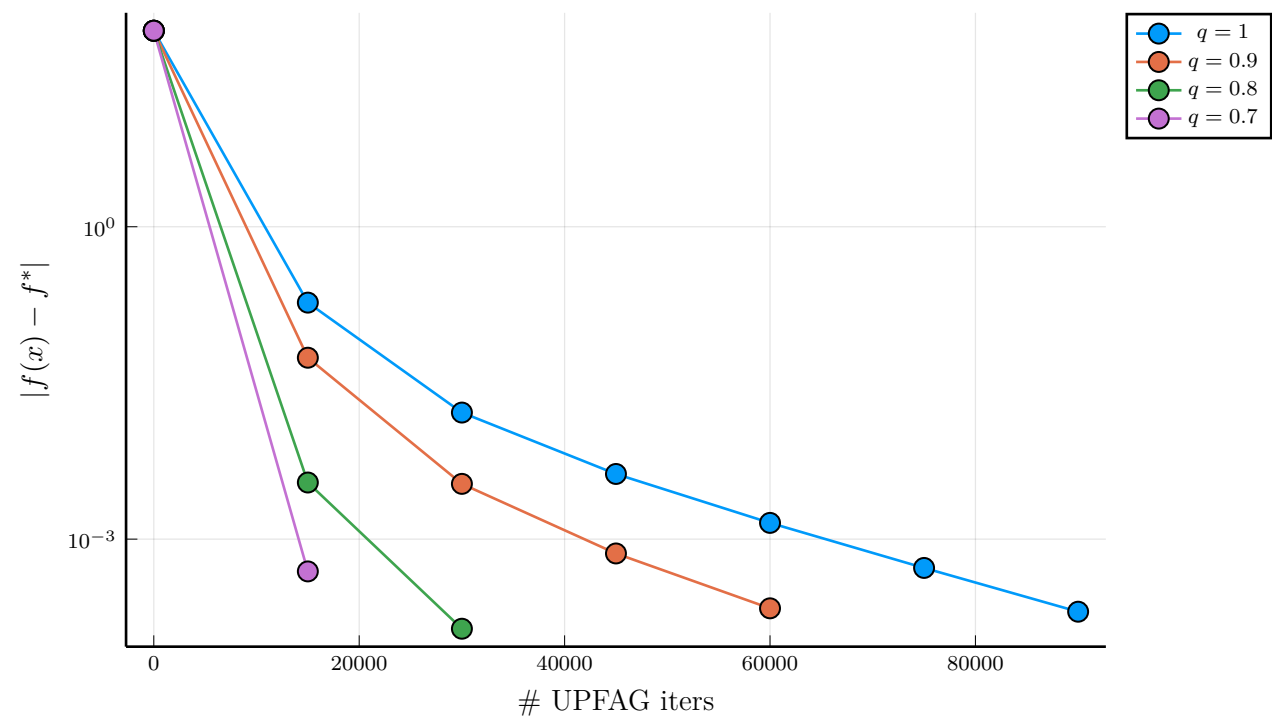

Supplement: supplementary_material [file clustering_mnist_objective.pdf › nonconvex_power_alm_supp/experiments/clustering/results/clustering_mnist_objective.pdf]

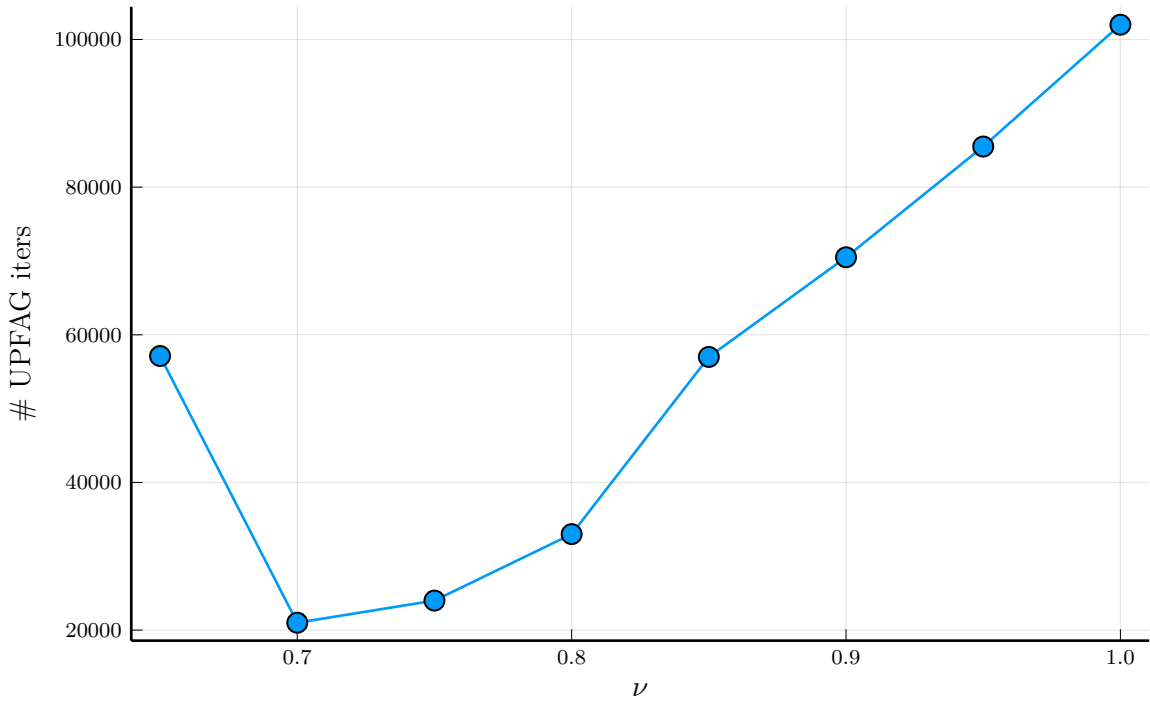

Supplement: supplementary_material [file clustering_mnist_powers.pdf › nonconvex_power_alm_supp/experiments/clustering/results/clustering_mnist_powers.pdf]

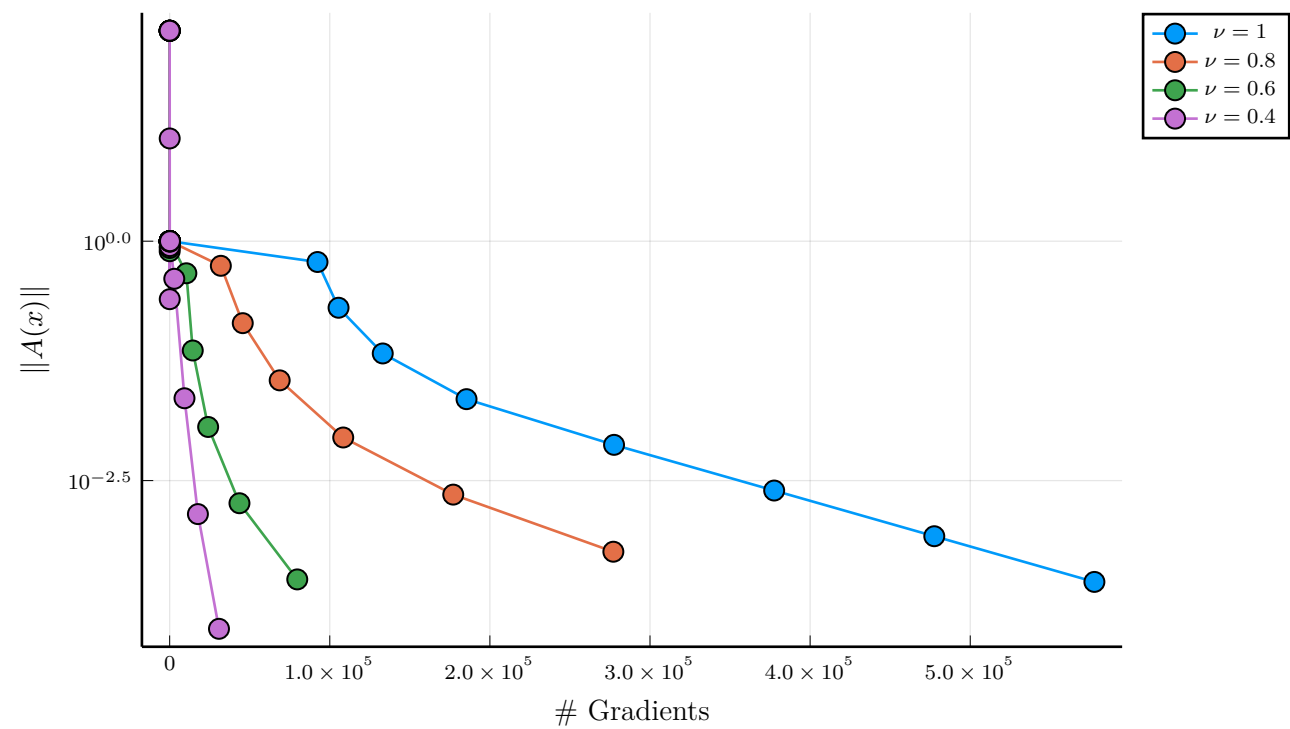

Supplement: supplementary_material [file gevp_gaussian_feasibility.pdf › nonconvex_power_alm_supp/experiments/gevp/results/gevp_gaussian_feasibility.pdf]

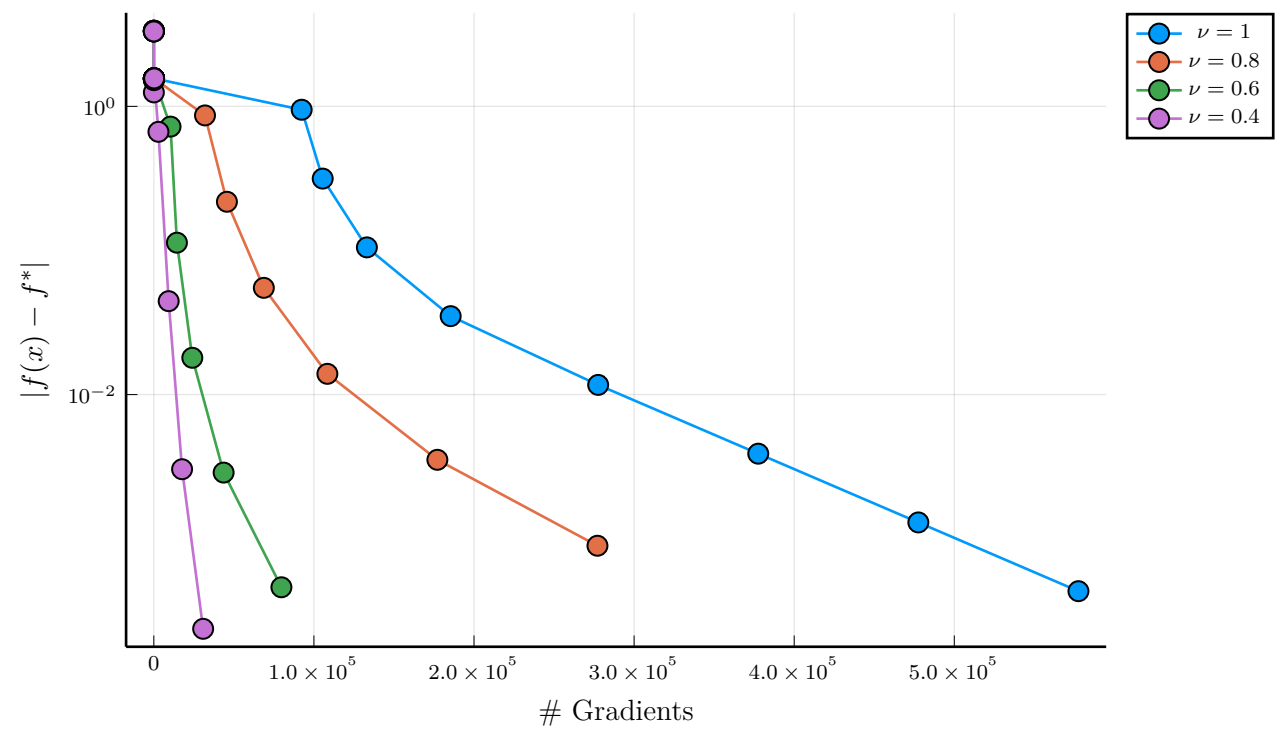

Supplement: supplementary_material [file gevp_gaussian_objective.pdf › nonconvex_power_alm_supp/experiments/gevp/results/gevp_gaussian_objective.pdf]

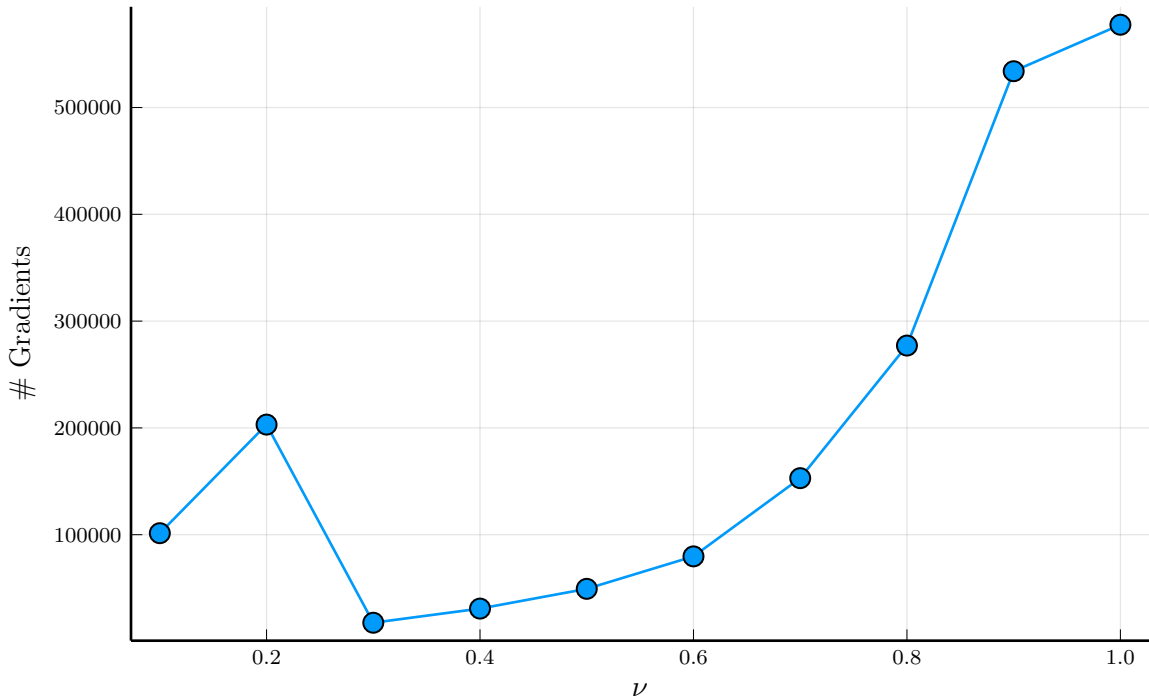

Supplement: supplementary_material [file gevp_gaussian_powers.pdf › nonconvex_power_alm_supp/experiments/gevp/results/gevp_gaussian_powers.pdf]

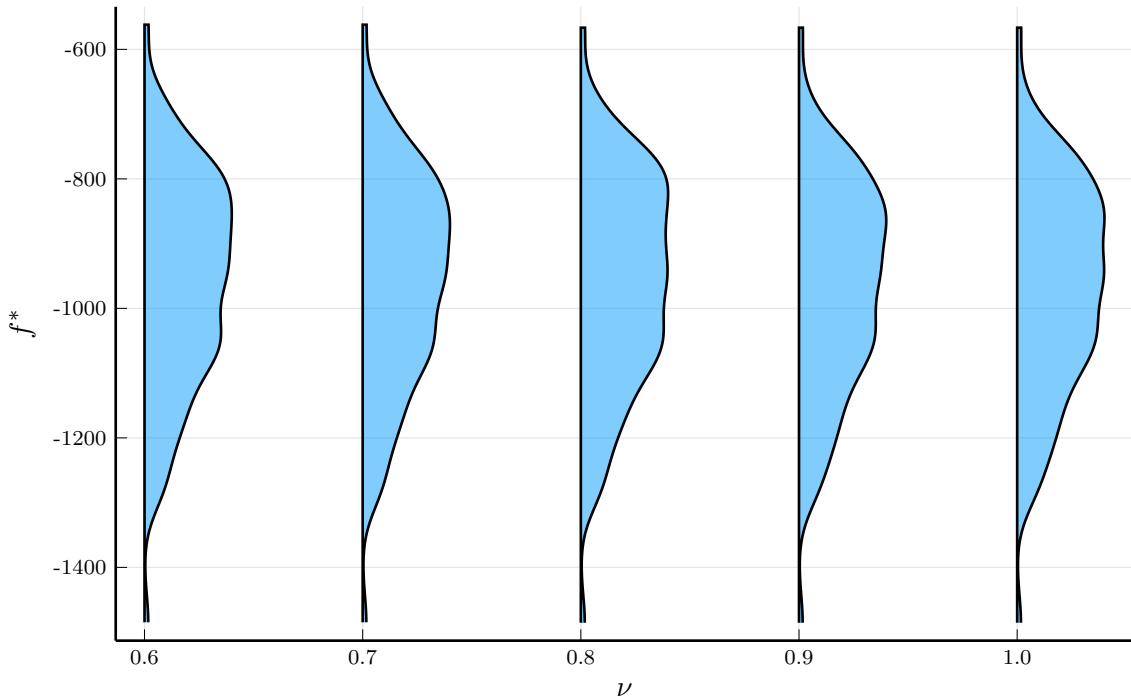

Supplement: supplementary_material [file quadratics_gaussian_20_100_double_fs_confidence.pdf › nonconvex_power_alm_supp/experiments/quadratics/results/quadratics_gaussian_20_100_double_fs_confidence.pdf]

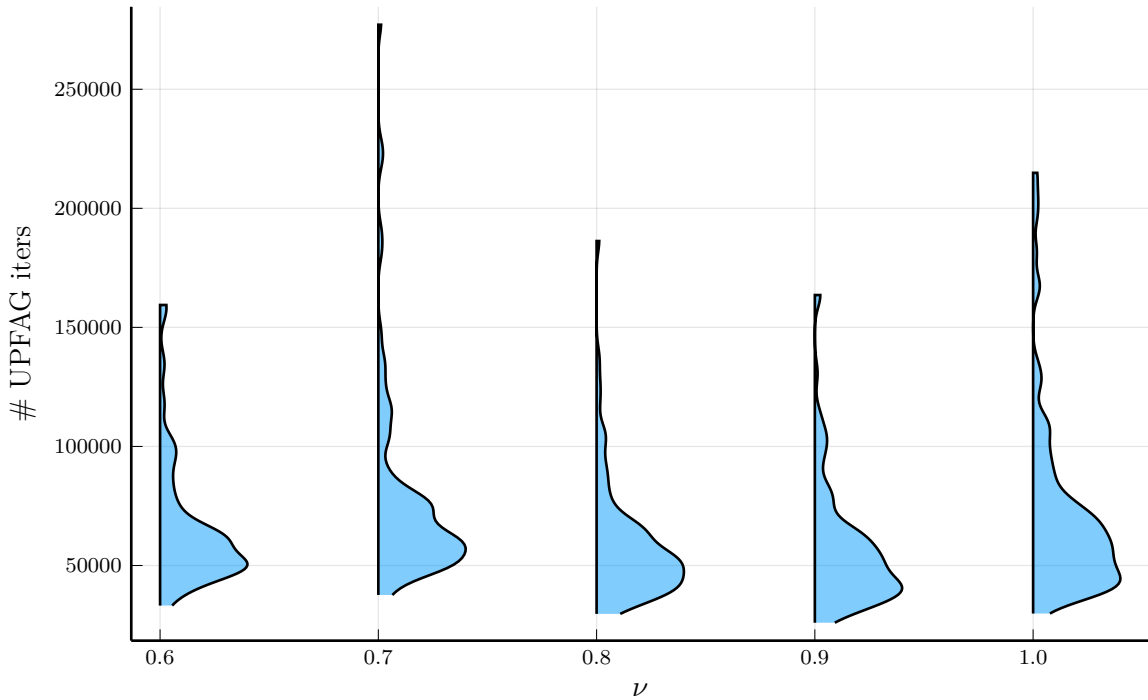

Supplement: supplementary_material [file quadratics_gaussian_20_100_double_powers_confidence.pdf › nonconvex_power_alm_supp/experiments/quadratics/results/quadratics_gaussian_20_100_double_powers_confidence.pdf]
